# Supplementary material for: Multi-color carbon dots for white light-emitting diodes
Source: Royal Society of Chemistry journal article supplement (doi:10.1039/c8ra09868a), 2019-01-01
Supplement: c8ra09868a1.pdf [file c8ra09868a1.pdf]

## Electronic Supporting Information

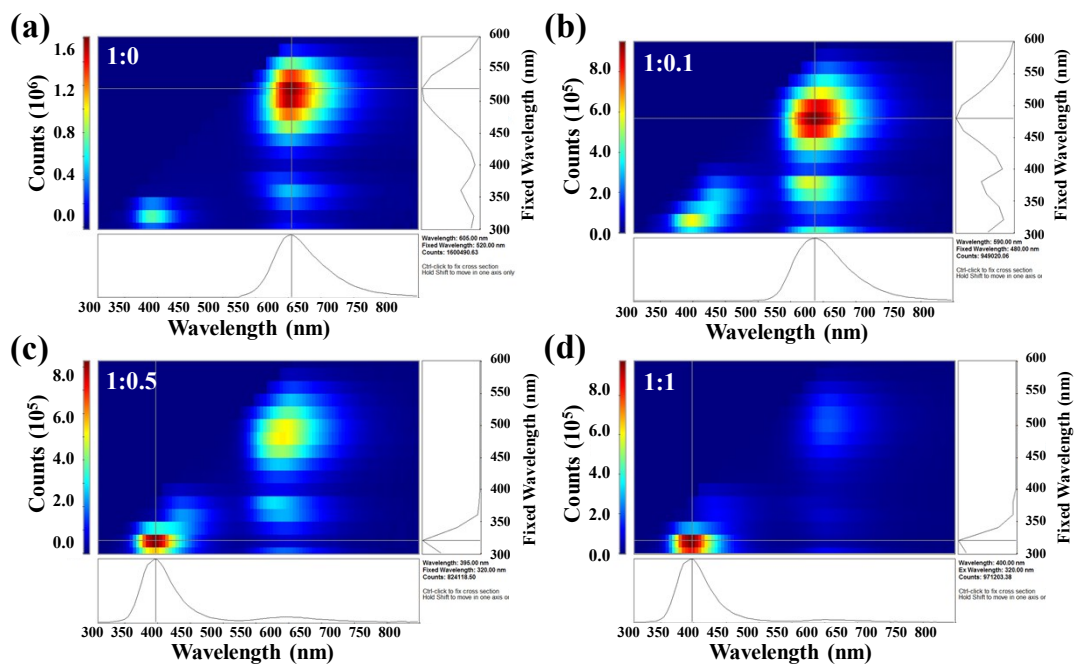

Figure S1. Contour plot of the photoluminescence spectra of the four different CDs samples with precursor ratio of (a) 1:0, (b) 1:0.1, (c) 1:0.5, and (d) 1:1, respectively.

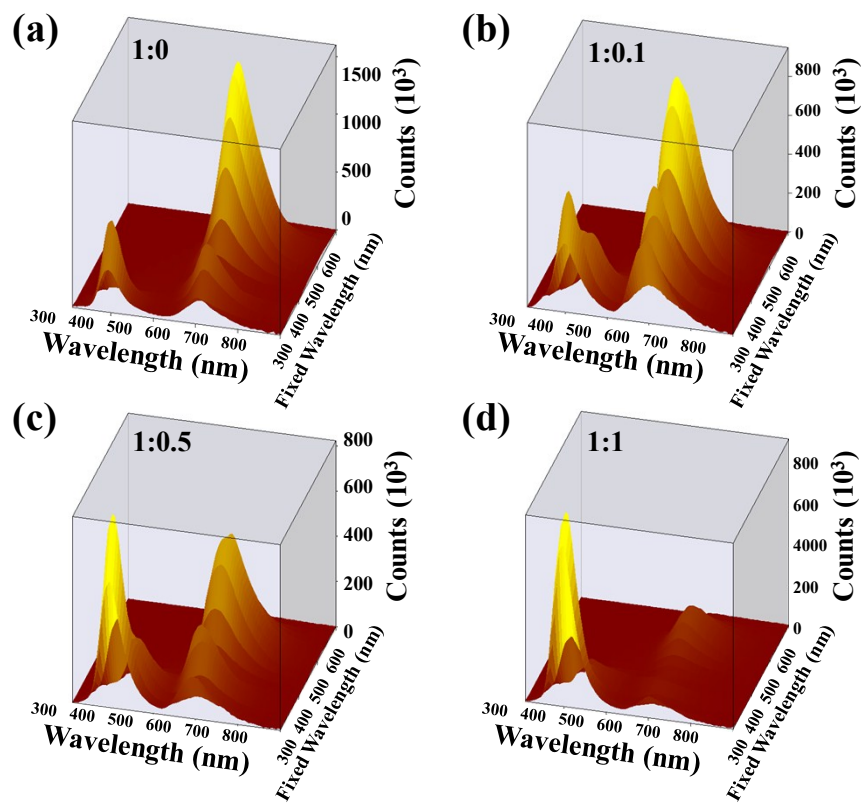

Figure S2. 3D plot of the excitation spectrum and emission spectra of the four different CDs samples with precursor ratio of (a) 1:0, (b) 1:0.1, (c) 1:0.5, and (d) 1:1, respectively.

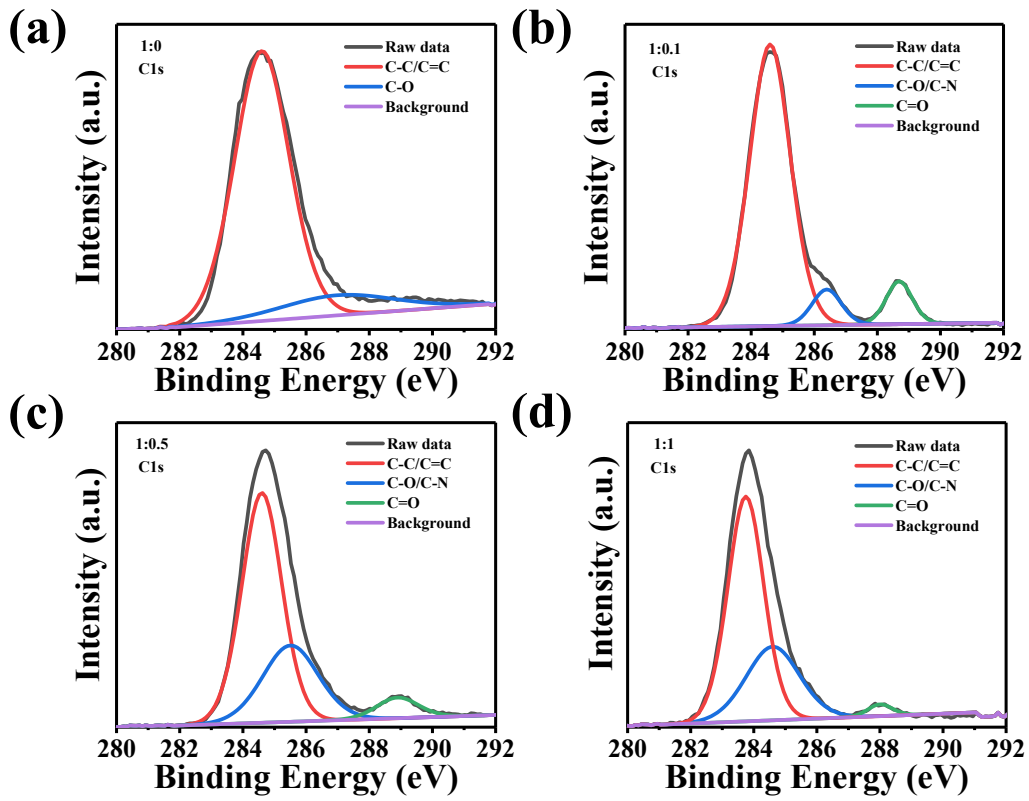

Figure S3. High-resolution C 1s XPS spectra for the four different CDs samples with precursor ratio of (a) 1:0, (b) 1:0.1, (c) 1:0.5, and (d) 1:1, respectively.

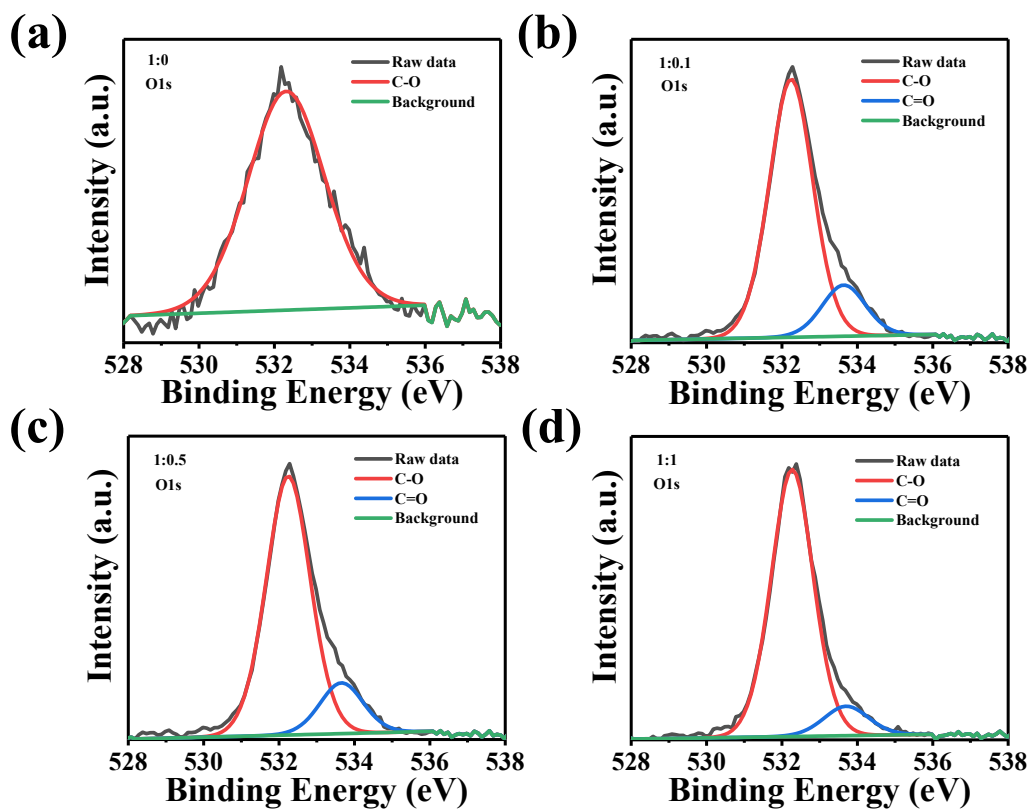

Figure S4. High-resolution O 1s XPS spectra for the four different CDs samples with precursor ratio of (a) 1:0, (b) 1:0.1, (c) 1:0.5, and (d) 1:1, respectively.

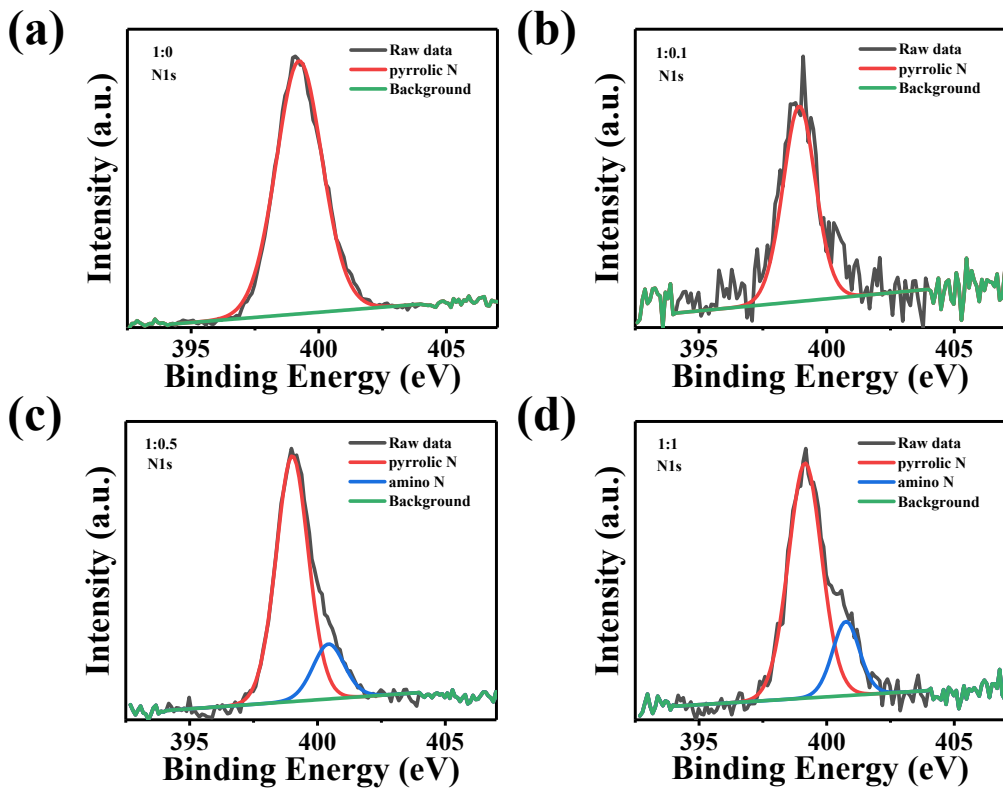

Figure S5. High-resolution N 1s XPS spectra for the four different CDs samples with precursor ratio of (a) 1:0, (b) 1:0.1, (c) 1:0.5, and (d) 1:1, respectively.

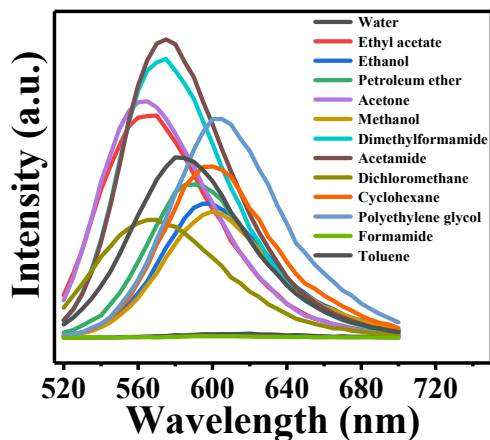

Figure S6. Fluorescence spectra of 30  $\mu\text{L}$  of CDs sample with precursor ratio of 1:0 diluted into 3 mL using different common solvents.

Table S1. Content of various elements in the four different CDs samples with precursor ratio of 1:0, 1:0.1, 1:0.5, and 1:1, respectively.

| <b>Ratio</b> | <b>C</b>     | <b>O</b>     | <b>N</b>     | <b>Zn</b>   |
|--------------|--------------|--------------|--------------|-------------|
| <b>1:0</b>   | <b>76.35</b> | <b>4.42</b>  | <b>19.23</b> | <b>0</b>    |
| <b>1:0.1</b> | <b>76.76</b> | <b>21.66</b> | <b>1.58</b>  | <b>0.09</b> |
| <b>1:0.5</b> | <b>74.62</b> | <b>19.59</b> | <b>5.62</b>  | <b>0.18</b> |
| <b>1:1</b>   | <b>73.45</b> | <b>16.29</b> | <b>10.01</b> | <b>0.25</b> |

Table S2. Content of oxygen containing functional groups in the four different CDs samples with precursor ratio of 1:0, 1:0.1, 1:0.5, and 1:1, respectively.

| <b>Ratio</b> | <b>C-C/C=C</b> | <b>C-O/C-N</b> | <b>C=O</b>  |
|--------------|----------------|----------------|-------------|
| <b>1:0</b>   | <b>86.65</b>   | <b>13.35</b>   | <b>0</b>    |
| <b>1:0.1</b> | <b>84.07</b>   | <b>8.24</b>    | <b>7.69</b> |
| <b>1:0.5</b> | <b>64.26</b>   | <b>29.70</b>   | <b>6.04</b> |
| <b>1:1</b>   | <b>65.68</b>   | <b>31.96</b>   | <b>2.36</b> |

Table S3. Content of carbon containing functional groups in the four different CDs samples with precursor ratio of 1:0, 1:0.1, 1:0.5, and 1:1, respectively.

| <b>Ratio</b> | <b>C-O</b>   | <b>C=O</b>   |
|--------------|--------------|--------------|
| <b>1:0</b>   | <b>100</b>   | <b>0</b>     |
| <b>1:0.1</b> | <b>83.47</b> | <b>16.53</b> |
| <b>1:0.5</b> | <b>83.83</b> | <b>16.17</b> |
| <b>1:1</b>   | <b>89.50</b> | <b>10.50</b> |

Table S4. Content of nitrogen containing functional groups in the four different CDs samples with precursor ratio of 1:0, 1:0.1, 1:0.5, and 1:1, respectively.

| <b>Ratio</b> | <b>pyrrolic N</b> | <b>amino N</b> |
|--------------|-------------------|----------------|
| <b>1:0</b>   | <b>100</b>        | <b>0</b>       |
| <b>1:0.1</b> | <b>100</b>        | <b>0</b>       |
| <b>1:0.5</b> | <b>82.01</b>      | <b>17.99</b>   |
| <b>1:1</b>   | <b>79.55</b>      | <b>20.45</b>   |

Table S5. Radical effect on the HOMO-LUMO energy gap of CDs.

|                                                                                   | HOMO-LUMO energy gap (eV)                                                         |                                                                                   |                                                                                    |                                                                                     |
|-----------------------------------------------------------------------------------|-----------------------------------------------------------------------------------|-----------------------------------------------------------------------------------|------------------------------------------------------------------------------------|-------------------------------------------------------------------------------------|
| 2.18                                                                              | 2.31                                                                              | 1.86                                                                              | 2.73                                                                               | 2.01                                                                                |
| 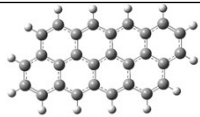 |  |  |  |  |

Table S6. CDs with different radical and their HOMO-LUMO energy gap.

| CDs models | Number of radical or doped atom on CDs |             |         |      |      | HOMO-LUMO energy gap(eV) |
|------------|----------------------------------------|-------------|---------|------|------|--------------------------|
|            | Zn                                     | Pyridinic N | Amino N | -C=O | -C-O |                          |
| <b>a</b>   | 0                                      | 0           | 1       | 1    | 2    | 0.90                     |
| <b>b</b>   | 0                                      | 1           | 0       | 1    | 2    | 1.02                     |
| <b>c</b>   | 1                                      | 1           | 0       | 1    | 2    | 0.71                     |
| <b>d</b>   | 1                                      | 0           | 1       | 1    | 2    | 1.10                     |
| <b>e</b>   | 2                                      | 0           | 2       | 2    | 1    | 0.91                     |
| <b>f</b>   | 2                                      | 2           | 0       | 2    | 1    | 1.17                     |
